# Supplementary material for: Broad-spectrum monoclonal antibodies against chikungunya virus structural proteins: Promising candidates for antibody-based rapid diagnostic test development
Source: PubMed Central journal article supplement (PMC6296674; doi:10.1371/journal.pone.0208851), 2018-12-17
Supplement: pone.0208851.s002.pdf [file pone.0208851.s002.pdf]

**S1 Fig**

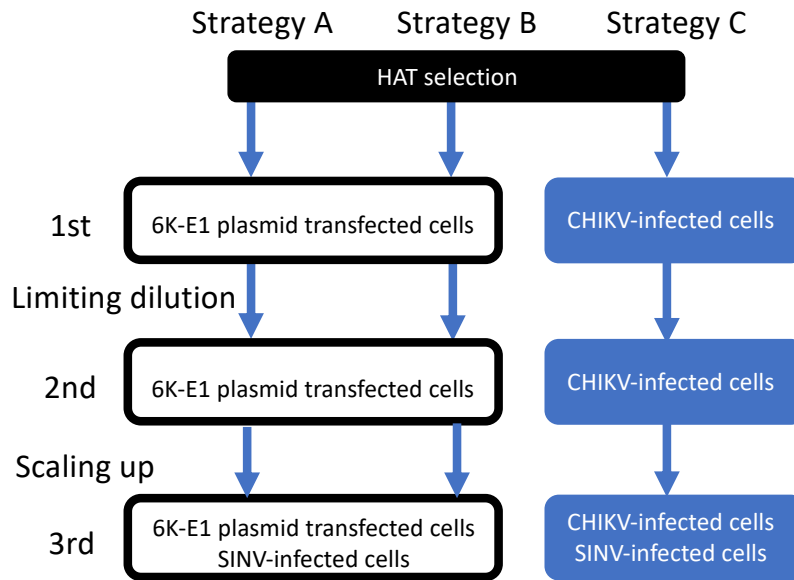

**S1 Fig. Flow chart of monoclonal antibody selection.**
