# Supplementary material for: Broad-spectrum monoclonal antibodies against chikungunya virus structural proteins: Promising candidates for antibody-based rapid diagnostic test development
Source: PubMed Central journal article supplement (PMC6296674; doi:10.1371/journal.pone.0208851), 2018-12-17
Supplement: pone.0208851.s003.pdf [file pone.0208851.s003.pdf]

S2 Fig

| Chikungunya virus | Alexa Fluor 488                                                                     | DAPI                                                                                | Merge                                                                                | mAb          |
|-------------------|-------------------------------------------------------------------------------------|-------------------------------------------------------------------------------------|--------------------------------------------------------------------------------------|--------------|
| CP10 strain       | 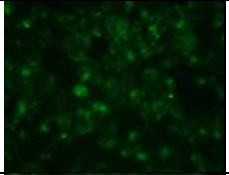   |    |    | <b>3D11</b>  |
| Ross low psg      |    |    |    |              |
| A1125             |    |    |    |              |
| Mock infection    |   |   |   |              |
| CP10              |  |  |  | <b>11E11</b> |
| Ross low psg      |  |  |  |              |
| A1125             |  |  |  |              |
| Mock infection    |  |  |  |              |
| CP10              |  |  |  | <b>13H11</b> |

|                |                                                                                     |                                                                                     |                                                                                      |      |
|----------------|-------------------------------------------------------------------------------------|-------------------------------------------------------------------------------------|--------------------------------------------------------------------------------------|------|
| Ross low psg   | 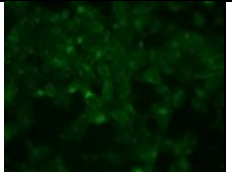   |    |    |      |
| A1125          |    |    |    |      |
| Mock infection |    |    |    |      |
| CP10           |    |    |    | 15B2 |
| Ross low psg   |   |   |   |      |
| A1125          |  |  |  |      |
| Mock infection |  |  |  |      |
| CP10           |  |  |  | 19B8 |
| Ross low psg   |  |  |  |      |
| A1125          |  |  |  |      |

|                |  |  |  |       |
|----------------|--|--|--|-------|
| Mock infection |  |  |  |       |
| CP10           |  |  |  | RC5-3 |
| Ross low psg   |  |  |  |       |
| A1125          |  |  |  |       |
| Mock infection |  |  |  |       |
| CP10           |  |  |  | CK47  |
| Ross low psg   |  |  |  |       |
| A1125          |  |  |  |       |
| Mock infection |  |  |  |       |
| CP10           |  |  |  | CK119 |

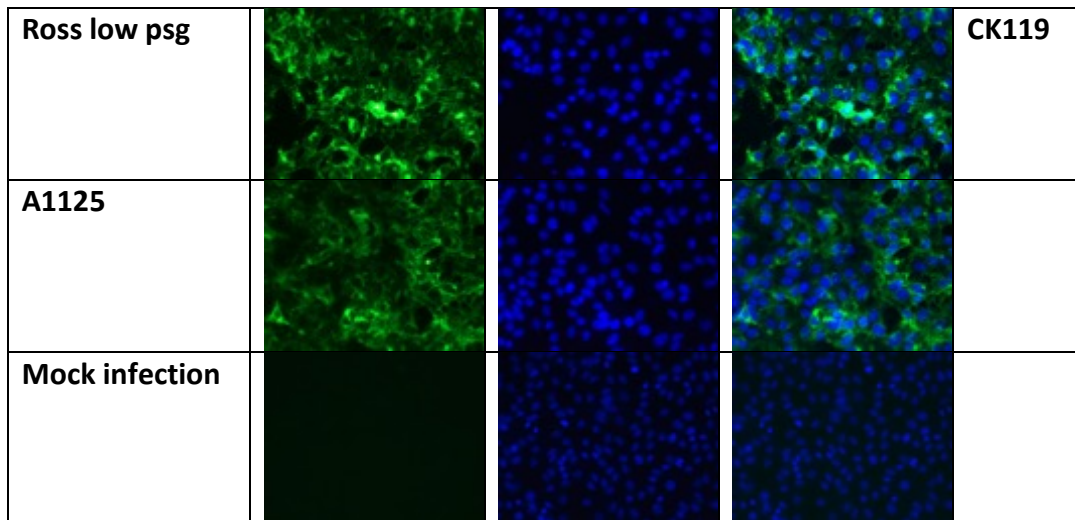

**S2 Fig. Reactivity profile of anti-CHIKV E1 mAbs against CHIKV-infected Vero cells.** Three strains of CHIKV (CP10 (ECSA-IOL), Ross low psg (ECSA genotype), and ARUBA-1125 (Asian genotype)) were used to infect Vero cells. Infected cells were stained with anti-CHIKV E protein monoclonal antibodies (mAb), name as indicated. Mouse anti-CHIKV E1 mAbs CK47 (reactivity restricted to ECSA-IOL) and CK119 (broadly reactive to CHIKV) were used as positive controls to detect CHIKV virus-infected cells. The detection was based on Alexa Fluor 488-conjugated secondary antibody (green, left panels). DAPI nuclear counterstain was used to stain nuclei of cells (blue, middle panels). Alexa Fluor 488 and DAPI images were merged using ImageJ 1.50i (National Institutes of Health USA) and the merged images are shown in the right panels (Merge). Images are representative of results obtained from three independent experiments and were taken under 40x objective magnification using a fluorescence microscope (Carl Zeiss, Oberkochen, Germany).
