# Supplementary material for: Broad-spectrum monoclonal antibodies against chikungunya virus structural proteins: Promising candidates for antibody-based rapid diagnostic test development
Source: PubMed Central journal article supplement (PMC6296674; doi:10.1371/journal.pone.0208851), 2018-12-17
Supplement: pone.0208851.s013.pdf [file pone.0208851.s013.pdf]

S12 Fig

| Alphavirus                          | Alexa Fluor 488 | DAPI | Merge | mAb   |
|-------------------------------------|-----------------|------|-------|-------|
| Sindbis virus,<br>strain<br>EGAR339 |                 |      |       | 3D11  |
|                                     |                 |      |       | 11E11 |
|                                     |                 |      |       | 13H11 |
|                                     |                 |      |       | 15B2  |
|                                     |                 |      |       | 19B8  |
|                                     |                 |      |       | RC5-3 |
|                                     |                 |      |       | 24B3  |
|                                     |                 |      |       | 26A2  |
|                                     |                 |      |       | 32A3  |
|                                     |                 |      |       | 37C7  |

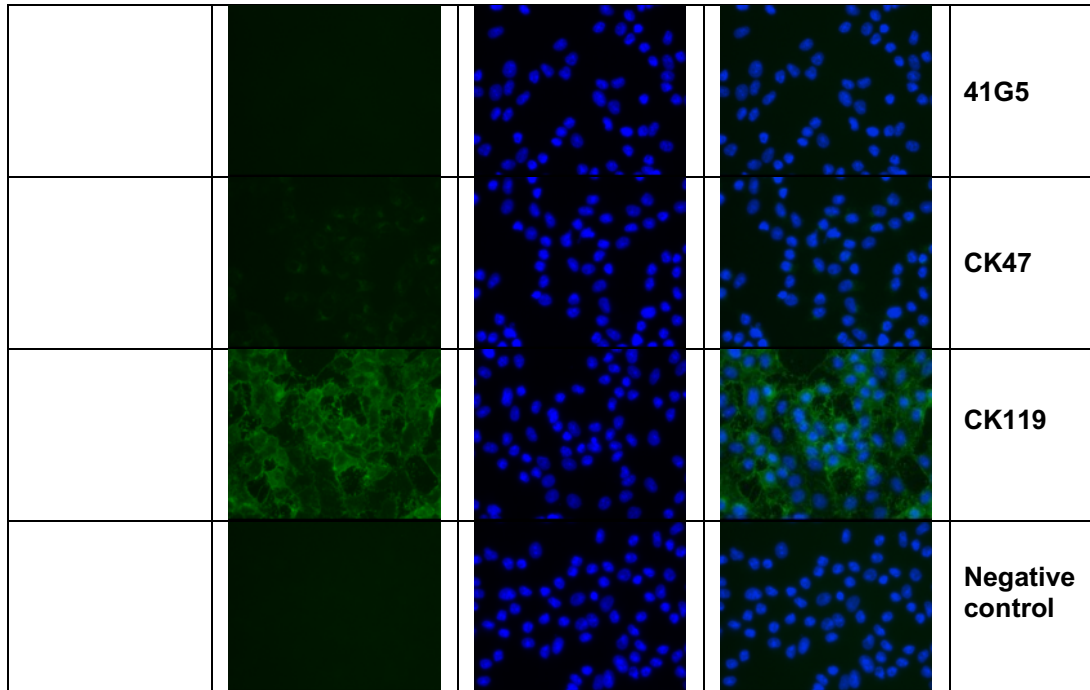

**S12 Fig. Indirect immunofluorescence analysis of anti-CHIKV mAbs against Sindbis virus (SINV) - infected Vero cells.** SINV (strain EGAR339) was used to infect Vero cells. Infected cells were stained with anti-CHIKV E protein or capsid protein monoclonal antibodies (mAbs), name as indicated. The detection was based on Alexa Fluor 488-conjugated secondary antibody (green, left panel). DAPI nuclear counterstain was used to stain nuclei of cells (blue, middle panels). Alexa Fluor 488 and DAPI images were merged using MetaVue (Molecular Devices Japan) and the merged images are shown in the right panels (Merge). Images are representative of results obtained from two independent experiments and were taken under 40x objective magnification using a fluorescence microscope (ECLIPSE Ti2, Nikon, Tokyo, Japan).
